# Supplementary material for: Dental health care providers’ concerns, perceived impact, and preparedness during the COVID-19 pandemic in Saudi Arabia
Source: PeerJ journal article supplement (doi:10.7717/peerj.11584), 2021-06-08
Supplement: Questionnaire_Used.pdf [file Questionnaire_Used.pdf]

# Concerns, perceived impact, and preparedness of oral healthcare workers in their working environment during COVID-19 pandemic

Dear Colleagues/Students current study aims to evaluate the oral healthcare workers' concerns, perceived impact, and preparedness in COVID-19 pandemic. Your answers will not be released to anyone but will only be used for the purpose stated above. Your participation in this exercise is voluntary; however, we would be grateful if you participate as we would like to collect as much information as possible.

\* Required

## 1. Category \*

*Mark only one oval.*

- Clinical Sciences Faculty/Consultants
- Basic Sciences Faculty
- Managerial Clerical staff/Dental Lab technicians/Attendants
- Dental Hygienists/Dental Assistants
- General Dental Practitioner

## 2. Location of Workplace \*

*Mark only one oval.*

- Riyadh
- Qassim
- Jeddah
- Eastern province
- Other: \_\_\_\_\_

3. Age \*

*Mark only one oval.*

20-29

30-39

40-49

50-59

60-70

4. Gender \*

*Mark only one oval.*

Male

Female

5. Marital Status \*

*Mark only one oval.*

Single

Married

Divorced

Widowed

6. Place of Work \*

*Mark only one oval.*

Government/Public Sector

Private Sector

7. Staying with \*

*Mark only one oval.*

Family/Friend

Alone







12. Preparedness for COVID-19 \*

Mark only one oval per row.

|                                                                                      | Strongly Agree (6)    | Agree (5)             | Probably Agree (4)    | Probably Disagree (3) | Disagree (2)          | Strongly Disagree (1) |
|--------------------------------------------------------------------------------------|-----------------------|-----------------------|-----------------------|-----------------------|-----------------------|-----------------------|
| There is an infection control committee & staff in my clinic                         | <input type="radio"/> | <input type="radio"/> | <input type="radio"/> | <input type="radio"/> | <input type="radio"/> | <input type="radio"/> |
| I have received training for infection control at my clinic                          | <input type="radio"/> | <input type="radio"/> | <input type="radio"/> | <input type="radio"/> | <input type="radio"/> | <input type="radio"/> |
| My clinic has a preparedness plan for a Covid-19 outbreak                            | <input type="radio"/> | <input type="radio"/> | <input type="radio"/> | <input type="radio"/> | <input type="radio"/> | <input type="radio"/> |
| My clinic has informed me of their Covid-19 outbreak preparedness plan               | <input type="radio"/> | <input type="radio"/> | <input type="radio"/> | <input type="radio"/> | <input type="radio"/> | <input type="radio"/> |
| I am personally prepared for a Covid-19 outbreak                                     | <input type="radio"/> | <input type="radio"/> | <input type="radio"/> | <input type="radio"/> | <input type="radio"/> | <input type="radio"/> |
| In the past 6 months I have attended infection control training sessions             | <input type="radio"/> | <input type="radio"/> | <input type="radio"/> | <input type="radio"/> | <input type="radio"/> | <input type="radio"/> |
| In the past 6 months I have bought disifectants                                      | <input type="radio"/> | <input type="radio"/> | <input type="radio"/> | <input type="radio"/> | <input type="radio"/> | <input type="radio"/> |
| In the past 6 months I have bought face masks                                        | <input type="radio"/> | <input type="radio"/> | <input type="radio"/> | <input type="radio"/> | <input type="radio"/> | <input type="radio"/> |
| In the past 6 months I have received adequate personal protective equipment training | <input type="radio"/> | <input type="radio"/> | <input type="radio"/> | <input type="radio"/> | <input type="radio"/> | <input type="radio"/> |
| I have someone to turn to if unsure of use of personal protective equipment          | <input type="radio"/> | <input type="radio"/> | <input type="radio"/> | <input type="radio"/> | <input type="radio"/> | <input type="radio"/> |

This content is neither created nor endorsed by Google.
